# Supplementary material
Source: publisher figshare collection journal article supplement (https://acs.figshare.com/ndownloader/files/10620283)
Supplement: Supplementary file 1 [file 10620283]

## Sheet: Dataset S2A. α&β-CDs_complex
	α-cyclodextrins															β-cyclodextrins															α-cyclodextrins									β-cyclodextrins
	Results					Results					Results					Results					Results					Results					Configuration file			Configuration file			Configuration file			Configuration file			Configuration file			Configuration file
	SET A					SET B					SET C					SET A					SET B					SET C					SET A			SET B			SET C			SET A			SET B			SET C
	mode	affinity	dist from best mode			mode	affinity	dist from best mode			mode	affinity	dist from best mode			mode	affinity	dist from best mode			mode	affinity	dist from best mode			mode	affinity	dist from best mode			Docking A1			Docking B1			Docking C1			Docking A1			Docking B1			Docking C1
		(kcal/mol)	rmsd l.b.	rmsd u.b.			(kcal/mol)	rmsd l.b.	rmsd u.b.			(kcal/mol)	rmsd l.b.	rmsd u.b.			(kcal/mol)	rmsd l.b.	rmsd u.b.			(kcal/mol)	rmsd l.b.	rmsd u.b.			(kcal/mol)	rmsd l.b.	rmsd u.b.		center_x	77		center_x	73682		center_x	76.69		center_x	77558		center_x	77093		center_x	77485
	Docking A1					Docking B1					Docking C1					Docking A1					Docking B1					Docking C1					center_y	27467		center_y	30224		center_y	37388		center_y	29.47		center_y	38958		center_y	27731
	1	2.8	0.000	0.000		1	4.4	0.000	0.000		1	8.9	0.000	0.000		1	-3.8	0.000	0.000		1	-4.4	0.000	0.000		1	-11.2	0.000	0.000		center_z	40252		center_z	44813		center_z	35836		center_z	41711		center_z	35119		center_z	41711
	Docking A2					Docking B2					Docking C2					Docking A2					2	-4.4	7930	12264		Docking C2					size_x	30		size_x	30		size_x	30		size_x	30		size_x	30		size_x	30
	1	2.9	0.000	0.000		1	4.1	0.000	0.000		1	8.8	0.000	0.000		1	-3.8	0.000	0.000		3	-4.3	13872	19047		1	-7.8	0.000	0.000		size_y	30		size_y	30		size_y	30		size_y	30		size_y	30		size_y	30
	Docking A3					Docking B3					Docking C3					Docking A3					4	-4.2	12823	17497		Docking C3					size_z	30		size_z	30		size_z	30		size_z	30		size_z	30		size_z	30
	1	2.8	0.000	0.000		1	4.4	0.000	0.000		1	9.0	0.000	0.000		1	-3.7	0.000	0.000		5	-4.1	7040	15545		1	-11.1	0.000	0.000		Docking A2			Docking B2			Docking C2			Docking A2			Docking B2			Docking C2
	Docking A4					2	4.3	0.372	5026		Docking C4					Docking A3					Docking B2					Docking C4					center_x	83355		center_x	81282		center_x	79052		center_x	77558		center_x	81069		center_x	78071
	1	2.9	0.000	0.000		3	4.2	1625	7851		1	6.6	0.000	0.000		1	-3.8	0.000	0.000		1	-4.8	0.000	0.000		1	-11.1	0.000	0.000		center_y	36363		center_y	30633		center_y	43699		center_y	30806		center_y	30782		center_y	43551
	Docking A5					4	4.2	1579	7874							Docking A5					2	-4.5	1283	11124							center_z	45444		center_z	42229		center_z	36059		center_z	36399		center_z	45741		center_z	36364
	1	3.0	0.000	0.000		5	4.2	0.758	5453							1	-3.8	0.000	0.000		3	-4.2	1468	11437							size_x	30		size_x	30		size_x	30		size_x	30		size_x	30		size_x	30
						6	4.0	0.634	8596												4	-4.2	1296	11275							size_y	30		size_y	30		size_y	30		size_y	30		size_y	30		size_y	30
						7	3.9	14006	19391												5	-4.0	6788	12419							size_z	30		size_z	30		size_z	30		size_z	30		size_z	30		size_z	30
						Docking B 4															Docking B3										Docking A3			Docking B3			Docking C3			Docking A3			Docking B3			Docking C3
						1	4.3	0.000	0.000												1	-4.0	0.000	0.000							center_x	81460		center_x	81866		center_x	72745		center_x	77		center_x	77485		center_x	78071
						Docking B5																									center_y	33826		center_y	37665		center_y	39417		center_y	36641		center_y	27731		center_y	37458
						1	4.4	0.000	0.000																						center_z	45132		center_z	32.94		center_z	36059		center_z	45.02		center_z	41711		center_z	36364
						Docking B6																									size_x	30		size_x	30		size_x	30		size_x	30		size_x	30		size_x	30
						1	4.3	0.000	0.000																						size_y	30		size_y	30		size_y	30		size_y	30		size_y	30		size_y	30
						2	4.3	0.090	9877																						size_z	30		size_z	30		size_z	30		size_z	30		size_z	30		size_z	30
						3	4.3	0.064	4978																						Docking A4			Docking B4			Docking C4			Docking A4						Docking C4
						4	4.3	0.152	8569																						center_x	81464		center_x	80167		center_x	76973		center_x	75555					center_x	78071
						5	4.1	0.412	4863																						center_y	39371		center_y	31519		center_y	28276		center_y	44182					center_y	43551
						6	4.1	1310	8232																						center_z	32346		center_z	46522		center_z	41453		center_z	39172					center_z	36364
						7	3.4	3853	10800																						size_x	30		size_x	30		size_x	30		size_x	30					size_x	30
						Docking B7																									size_y	30		size_y	30		size_y	30		size_y	30					size_y	30
						1	3.9	0.000	0.000																						size_z	30		size_z	30		size_z	30		size_z	30					size_z	30
																															Docking A5			Docking B5						Docking A5
																															center_x	79022		center_x	74056					center_x	81254
	Dataset S2A. Here we report the best results of docking cycles. According to the experimental and literature data we assumed that cyclodextrins interact with spiramycin in 3:1 ratio to form the complex. The first cycle (SET A) is aimed at identifying the best accommodation of first cyclodextrin on to spiramicin molecules, using cyclodextrin molecule as a ligand and spiramicin as a receptor. The s…																														center_y	35013		center_y	26878					center_y	44182
																															center_z	42718		center_z	39993					center_z	31587
																															size_x	30		size_x	30					size_x	30
																															size_y	30		size_y	30					size_y	30
																															size_z	30		size_z	30					size_z	30
																																		Docking B6
																																		center_x	74976
																																		center_y	30429
																																		center_z	38796
																																		size_x	30
																																		size_y	30
																																		size_z	30
																																		Docking B7
																																		center_x	79806
																																		center_y	26831
																																		center_z	45581
																																		size_x	30
																																		size_y	30
																																		size_z	30

## Sheet: Dataset S2B. Methylation_Result
	Randomly Methylated β-CDs: one monomer of glucose-O-Methylated
	2,3,6-tri-O-methyl-glucose					2,3-di-O-methyl-glucose					2,6-di-O-methyl-glucose					2-O-methyl-glucose					3-O-methyl-glucose					6-O-methyl-glucose					3,6-di-O-methyl-glucose
	mode	affinity	dist from best mode			mode	affinity	dist from best mode			mode	affinity	dist from best mode			mode	affinity	dist from best mode			mode	affinity	dist from best mode			mode	affinity	dist from best mode			mode	affinity	dist from best mode
		(kcal/mol)	rmsd l.b.	rmsd u.b.			(kcal/mol)	rmsd l.b.	rmsd u.b.			(kcal/mol)	rmsd l.b.	rmsd u.b.			(kcal/mol)	rmsd l.b.	rmsd u.b.			(kcal/mol)	rmsd l.b.	rmsd u.b.			(kcal/mol)	rmsd l.b.	rmsd u.b.			(kcal/mol)	rmsd l.b.	rmsd u.b.
	Docking 1					Docking 1					Docking 1					Docking 1					Docking 1					Docking 1					Docking 1
	1	-3.3	0.000	0.000		1	-3.4	0.000	0.000		1	-3.4	0.000	0.000		1	-3.4	0.000	0.000		1	-3.4	0.000	0.000		1	-3.3	0.000	0.000		1	-3.3	0.000	0.000
	Docking 2					Docking 2					Docking 2					Docking 2					Docking 2					Docking 2					Docking 2
	1	-3.3	0.000	0.000		1	-3.3	0.000	0.000		1	-3.4	0.000	0.000		1	-3.4	0.000	0.000		1	-3.4	0.000	0.000		1	-3.3	0.000	0.000		1	-3.3	0.000	0.000
	Docking 3					Docking 3					Docking 3					Docking 3					Docking 3					Docking 3					Docking 3
	1	-3.7	0.000	0.000		1	-3.7	0.000	0.000		1	-3.7	0.000	0.000		1	-3.6	0.000	0.000		1	-3.6	0.000	0.000		1	-3.7	0.000	0.000		1	-3.7	0.000	0.000
	Docking 4					Docking 4					Docking 4					Docking 4					Docking 4					Docking 4					Docking 4
	1	-3.7	0.000	0.000		1	-3.7	0.000	0.000		1	-3.7	0.000	0.000		1	-3.7	0.000	0.000		1	-3.8	0.000	0.000		1	-3.7	0.000	0.000		1	-3.7	0.000	0.000
	Docking 5					Docking 5					Docking 5					Docking 5					Docking 5					Docking 5					Docking 5
	1	-3.7	0.000	0.000		1	-3.7	0.000	0.000		1	-3.7	0.000	0.000		1	-3.7	0.000	0.000		1	-3.7	0.000	0.000		1	-3.6	0.000	0.000		1	-3.7	0.000	0.000
	Randomly Methylated β-CDs: two monomer of Glucose-O-Methylated (1°[2,3,6-O-tri_methyl-gucose] and 2° [variable methylation] monomers)
	2,3,6-tri-O-methyl-glucose					2,6-tri-O-methyl-glucose					2,3-di-O-methyl-glucose					2-O-methyl-glucose					3,6-di-O-methyl-glucose					3-O-methyl-glucose					6-O-methyl-glucose
	mode	affinity	dist from best mode			mode	affinity	dist from best mode			mode	affinity	dist from best mode			mode	affinity	dist from best mode			mode	affinity	dist from best mode			mode	affinity	dist from best mode			mode	affinity	dist from best mode
		(kcal/mol)	rmsd l.b.	rmsd u.b.			(kcal/mol)	rmsd l.b.	rmsd u.b.			(kcal/mol)	rmsd l.b.	rmsd u.b.			(kcal/mol)	rmsd l.b.	rmsd u.b.			(kcal/mol)	rmsd l.b.	rmsd u.b.			(kcal/mol)	rmsd l.b.	rmsd u.b.			(kcal/mol)	rmsd l.b.	rmsd u.b.
	Docking 1					Docking 1					Docking 1					Docking 1					Docking 1					Docking 1					Docking 1
	1	-3.3	0.000	0.000		1	-3.5	0.000	0.000		1	-3.3	0.000	0.000		1	-3.4	0.000	0.000		1	-3.3	0.000	0.000		1	-3.3	0.000	0.000		1	-3.3	0.000	0.000
	Docking 2					Docking 2					Docking 2					Docking 2					Docking 2					Docking 2					Docking 2
	1	-3.3	0.000	0.000		1	-3.3	0.000	0.000		1	-3.3	0.000	0.000		1	-3.4	0.000	0.000		1	-3.3	0.000	0.000		1	-3.3	0.000	0.000		1	-3.3	0.000	0.000
	Docking 3					Docking 3					Docking 3					Docking 3					Docking 3					Docking 3					Docking 3
	1	-3.7	0.000	0.000		1	-3.8	0.000	0.000		1	-3.6	0.000	0.000		1	-3.7	0.000	0.000		1	-3.6	0.000	0.000		1	-3.6	0.000	0.000		1	-3.6	0.000	0.000
	Docking 4					Docking 4					Docking 4					Docking 4					Docking 4					Docking 4					Docking 4
	1	-3.7	0.000	0.000		1	-3.7	0.000	0.000		1	-3.7	0.000	0.000		1	-3.7	0.000	0.000		1	-3.5	0.000	0.000		1	-3.6	0.000	0.000		1	-3.7	0.000	0.000
	Docking 5					Docking 5					Docking 5					Docking 5					Docking 5					Docking 5					Docking 5
	1	-3.7	0.000	0.000		1	-3.7	0.000	0.000		1	-3.8	0.000	0.000		1	-3.7	0.000	0.000		1	-3.6	0.000	0.000		1	-3.8	0.000	0.000		1	-3.7	0.000	0.000
	Randomly Methylated β-CDs: two monomer of Glucose-O-Methylated (1°[2,3,6-O-tri_methyl-gucose] and 4° [variable methylation] monomers)
	2,3,6-tri-O-methyl-glucose					2,6-tri-O-methyl-glucose					2,3-di-O-methyl-glucose					2-O-methyl-glucose					3,6-di-O-methyl-glucose					3-O-methyl-glucose					6-O-methyl-glucose
	mode	affinity	dist from best mode			mode	affinity	dist from best mode			mode	affinity	dist from best mode			mode	affinity	dist from best mode			mode	affinity	dist from best mode			mode	affinity	dist from best mode			mode	affinity	dist from best mode
		(kcal/mol)	rmsd l.b.	rmsd u.b.			(kcal/mol)	rmsd l.b.	rmsd u.b.			(kcal/mol)	rmsd l.b.	rmsd u.b.			(kcal/mol)	rmsd l.b.	rmsd u.b.			(kcal/mol)	rmsd l.b.	rmsd u.b.			(kcal/mol)	rmsd l.b.	rmsd u.b.			(kcal/mol)	rmsd l.b.	rmsd u.b.
	Docking 1					Docking 1					Docking 1					Docking 1					Docking 1					Docking 1					Docking 1
	1	-3.3	0.000	0.000		1	-3.3	0.000	0.000		1	-3.3	0.000	0.000		1	-3.3	0.000	0.000		1	-3.1	0.000	0.000		1	-3.3	0.000	0.000		1	-3.3	0.000	0.000
	Docking 2					Docking 2					Docking 2					Docking 2					Docking 2					Docking 2					Docking 2
	1	-3.3	0.000	0.000		1	-3.3	0.000	0.000		1	-3.3	0.000	0.000		1	-3.3	0.000	0.000		1	-3.1	0.000	0.000		1	-3.3	0.000	0.000		1	-3.3	0.000	0.000
	Docking 3					Docking 3					Docking 3					Docking 3					Docking 3					Docking 3					Docking 3
	1	-3.6	0.000	0.000		1	-3.3	0.000	0.000		1	-3.7	0.000	0.000		1	-3.7	0.000	0.000		1	-3.4	0.000	0.000		1	-3.8	0.000	0.000		1	-3.7	0.000	0.000
	Docking 4					Docking 4					Docking 4					Docking 4					Docking 4					Docking 4					Docking 4
	1	-3.6	0.000	0.000		1	-3.7	0.000	0.000		1	-3.7	0.000	0.000		1	-3.7	0.000	0.000		1	-3.6	0.000	0.000		1	-3.7	0.000	0.000		1	-3.7	0.000	0.000
	Docking 5					Docking 5					Docking 5					Docking 5					Docking 5					Docking 5					Docking 5
	1	-3.7	0.000	0.000		1	-3.7	0.000	0.000		1	-3.6	0.000	0.000		1	-3.5	0.000	0.000		1	-3.7	0.000	0.000		1	-3.7	0.000	0.000		1	-3.7	0.000	0.000
	Randomly Methylated β-CDs: big or small border methylation
	Big Border (2-O-methyl-glucose)					Big Border (3-O-methyl-glucose)					Small Border (6-O-methyl-glucose)					Big Border (2-O-methyl-glucose)					Big and Small Border (3,6-di-O-methyl-glucose)					Big and Small Border (2,6-di-O-methyl-glucose)					Big and Small Border (2,3,6-tri-O-methyl-glucose)
	mode	affinity	dist from best mode			mode	affinity	dist from best mode			mode	affinity	dist from best mode			mode	affinity	dist from best mode			mode	affinity	dist from best mode			mode	affinity	dist from best mode			mode	affinity	dist from best mode
		(kcal/mol)	rmsd l.b.	rmsd u.b.			(kcal/mol)	rmsd l.b.	rmsd u.b.			(kcal/mol)	rmsd l.b.	rmsd u.b.			(kcal/mol)	rmsd l.b.	rmsd u.b.			(kcal/mol)	rmsd l.b.	rmsd u.b.			(kcal/mol)	rmsd l.b.	rmsd u.b.			(kcal/mol)	rmsd l.b.	rmsd u.b.
	Docking 1					Docking 1					Docking 1					Docking 1					Docking 1					Docking 1					Docking 1
	1	-3.3	0.000	0.000		1	-3.1	0.000	0.000		1	-3.2	0.000	0.000		1	-3.1	0.000	0.000		1	-3.1	0.000	0.000		1	-3.1	0.000	0.000		1	-2.9	0.000	0.000
	Docking 2					Docking 2					Docking 2					Docking 2					Docking 2					Docking 2					Docking 2
	1	-3.3	0.000	0.000		1	-3.1	0.000	0.000		1	-3.2	0.000	0.000		1	-2.9	0.000	0.000		1	-3.3	0.000	0.000		1	-3.1	0.000	0.000		1	-2.9	0.000	0.000
	Docking 3					Docking 3					Docking 3					Docking 3					Docking 3					Docking 3					Docking 3
	1	-3.4	0.000	0.000		1	-3.7	0.000	0.000		1	-3.5	0.000	0.000		1	-3.0	0.000	0.000		1	-3.1	0.000	0.000		1	-3.2	0.000	0.000		1	-2.9	0.000	0.000
	Docking 4					Docking 4					Docking 4					Docking 4					Docking 4					Docking 4					Docking 4
	1	-3.6	0.000	0.000		1	-3.6	0.000	0.000		1	-3.6	0.000	0.000		1	-3.5	0.000	0.000		1	-3.4	0.000	0.000		1	-3.4	0.000	0.000		1	-3.4	0.000	0.000
	Docking 5					Docking 5					Docking 5					Docking 5					Docking 5					Docking 5					Docking 5
	1	-3.5	0.000	0.000		1	-3.7	0.000	0.000		1	-3.5	0.000	0.000		1	-3.3	0.000	0.000		1	-3.4	0.000	0.000		1	-3.4	0.000	0.000		1	-3.5	0.000	0.000
	Dataset S2B. As reported in Materials and Methods, in this study we used randomly methylated β-cyclodextrins with methyl groups on the C-2, C-3 and/or C-6 carbon atoms. Here, we generated models of β-cyclodextrins methylated on one monomer, two monomers (1°,2° and 1°,4°) or all monomers (big and small border), and, for each configuration, we performed molecular docking. The results suggest that m…

## Sheet: Dataset S2C. Rameb-CDs_complex
	RAMEB-cyclodextrins
	Results
	SET A					SET B					SET C					Configuration file			Configuration file			Configuration file
	mode	affinity	dist from best mode			mode	affinity	dist from best mode			mode	affinity	dist from best mode			SET A			SET B			SET C
		(kcal/mol)	rmsd l.b.	rmsd u.b.			(kcal/mol)	rmsd l.b.	rmsd u.b.			(kcal/mol)	rmsd l.b.	rmsd u.b.		Docking A1			Docking B1			Docking C1
	Docking A1					Docking B1					Docking C1					center_x	82367		center_x	74989		center_x	76407
	1	-3.3	0.000	0.000		1	-3.9	0.000	0.000		1	-8.5	0.000	0.000		center_y	32271		center_y	28714		center_y	39061
	2	-3.3	5171	11171		Docking B2					Docking C2					center_z	46364		center_z	43.64		center_z	39365
	Docking A2					1	-3.8	0.000	0.000		1	-7.8	0.000	0.000		size_x	30		size_x	30		size_x	30
	1	-3.3	0.000	0.000		Docking B3					Docking C3					size_y	30		size_y	30		size_y	30
	Docking A3					1	-3.4	0.000	0.000		1	-8.5	0.000	0.000		size_z	30		size_z	30		size_z	30
	1	-3.5	0.000	0.000		2	-3.2	8238	16836		Docking C4					Docking A2			Docking B2			Docking C2
	2	-3.4	1654	2296		Docking B4					1	-10.7	0.000	0.000		center_x	76354		center_x	74989		center_x	76407
	3	-3.4	2100	3690		1	-3.5	0.000	0.000		Docking C5					center_y	30833		center_y	32807		center_y	39061
	4	-3.4	1638	3694							1	-10.1	0.000	0.000		center_z	43023		center_z	27438		center_z	39365
	5	-3.2	1671	11901							Docking C6					size_x	30		size_x	30		size_x	30
	6	-3.2	8846	14563							1	-10.0	0.000	0.000		size_y	30		size_y	30		size_y	30
	7	-3.2	8174	16100												size_z	30		size_z	30		size_z	30
																Docking A3			Docking B3			Docking C3
																center_x	76467		center_x	79578		center_x	76407
	Dataset S2C. By using the same approach reported in the note to File S2A (α&β-cyclodextrins_complex) we performed docking with randomly methylated β-cyclodextrins starting from methylated model on border (carbon 3,6 methylated of each monomers of glucose). We selected this model to maximize steric effect of methyl group. The computed affinity suggests that randomly methylated β-cyclodextrins form…															center_y	35778		center_y	32658		center_y	39061
																center_z	30262		center_z	29041		center_z	39365
																size_x	30		size_x	30		size_x	30
																size_y	30		size_y	30		size_y	30
																size_z	30		size_z	30		size_z	30
																			Docking B4			Docking C4
																			center_x	80607		center_x	76407
																			center_y	29536		center_y	39061
																			center_z	46507		center_z	39365
																			size_x	30		size_x	30
																			size_y	30		size_y	30
																			size_z	30		size_z	30
																						Docking C5
																						center_x	76407
																						center_y	39061
																						center_z	39365
																						size_x	30
																						size_y	30
																						size_z	30
																						Docking C6
																						center_x	76407
																						center_y	39061
																						center_z	39365
																						size_x	30
																						size_y	30
																						size_z	30

## Sheet: Dataset S2D. β-CDs_vs_β-CDs
	SET A - no methylation					SET B - 3,6 methylation (all monomer)
	mode	affinity	dist from best mode			mode	affinity	dist from best mode			Configuration file			Configuration file
		(kcal/mol)	rmsd l.b.	rmsd u.b.			(kcal/mol)	rmsd l.b.	rmsd u.b.		SET A			SET B
	Docking A1					Docking B1					Docking A1			Docking B1
	1	-6.0	0.000	0.000		1	-3.2	0.000	0.000		center_x	86789		center_x	81921
	Docking A2					Docking B2					center_y	31395		center_y	38329
	1	-6.0	0.000	0.000		1	-3.2	0.000	0.000		center_z	50719		center_z	51089
	Docking A3					Docking B3					size_x	30		size_x	30
	1	-5.7	0.000	0.000		1	-3.1	0.000	0.000		size_y	30		size_y	30
											size_z	30		size_z	30
											Docking A2			Docking B2
	Dataset S2D. In order to understand the mechanism of the complex formation we performed docking with cyclodextrins vs cyclodextrins. SET A reports the result of native β-cyclodextrins, SET B the results of randomly methylated β-cyclodextrins. The results suggest the possibility of aggregation of native cyclodextrins that can affect the complex formation with spiramycin. This data is used to predi…										center_x	89967		center_x	81921
											center_y	31395		center_y	38329
											center_z	47217		center_z	47863
											size_x	30		size_x	30
											size_y	30		size_y	30
											size_z	30		size_z	30
											Docking A3			Docking B3
											center_x	82494		center_x	81921
											center_y	31395		center_y	35773
											center_z	47217		center_z	53866
											size_x	30		size_x	30
											size_y	30		size_y	30
											size_z	30		size_z	30
